# Supplementary material for: Inflammatory Cellular Response to Mechanical Ventilation in Elastase-Induced Experimental Emphysema: Role of Preexisting Alveolar Macrophages Infiltration
Source: Biomed Res Int. 2018 Dec 19;2018:5721293. doi: 10.1155/2018/5721293 (PMC6313972; doi:10.1155/2018/5721293)
Supplement: Supplementary Materials — Additional information about the methods are available in supplementary material file, including arterial blood gases data, fluorochrome-conjugated anti-mouse antibodies used, and flow cytometric analysis of inflammatory cell populations in mouse lungs. [file 5721293.f1.pdf]

1 **SUPPLEMENTARY MATERIALS**

2

3 **INFLAMMATORY CELLULAR RESPONSE TO MECHANICAL VENTILATION IN**  
4 **ELASTASE-INDUCED EXPERIMENTAL EMPHYSEMA: ROLE OF PRE-EXISTING**  
5 **ALVEOLAR MACROPHAGES INFILTRATION**

6

7 Anahita ROUZE, Guillaume VOIRIOT, Elise GUIVARCH, Françoise ROUX, Jeanne TRAN VAN  
8 NHIEU, Daniel ISABEY, Laurent BROCHARD, Bernard MAITRE, Armand MEKONTSO-  
9 DESSAP, and Jorge BOCZKOWSKI

10

11 **METHODS**

12

13 **Animal model**

14 All the experiments were performed in accordance with the official regulations of the French Ministry  
15 of Agriculture and the US National Institute of Health guidelines for the experimental use of animals,  
16 were approved by the local institutional animal care and use committee, and were conducted in a  
17 specific “little animal” platform (Plateforme Exploration Fonctionnelle du Petit Animal, INSERM  
18 U955, Créteil, France). Six-weeks-old male C57BL/6 mice (Janvier Labs, Le Genest Saint-Isle,  
19 France) were used. Under anesthesia, mice received the instillation of either 5 IU of porcine  
20 pancreatic elastase (Elastin Products, Owensville, MO, USA) diluted in 50 µl of saline (Elastase  
21 mice), or 50 µl of saline (Saline mice) into the surgically exposed trachea. Mice were then subjected  
22 to subsequent ventilation at two time points, 14 and 21 days after instillation.

23

24 **Mechanical ventilation**

25 Mice were anesthetized with intraperitoneal thiopental (30  $\mu\text{g/g}$  of body weight; Hospira, Meudon-La-  
26 Forêt, France) followed by continuous inhaled 5% isoflurane (Abbott, Rungis, France). The larynx  
27 was surgically exposed and the trachea was intubated orally under direct vision with a metal cannula  
28 (internal diameter of 1 mm, Harvard Apparatus, Les Ulis, France). Mice in mechanical ventilation  
29 (MV) group were ventilated in the supine position using humidified gas (20mgH<sub>2</sub>O/L absolute  
30 humidity, MR410 humidifier, Fischer & Paykel Healthcare, Courtaboeuf, France), with a Vt of 8  $\mu\text{L/g}$   
31 of body weight, a respiratory rate of 180 /min, an inspiratory to expiratory time ratio of 67%, an end-  
32 expiratory pressure of 1.5 cmH<sub>2</sub>O, and a fraction of inspired oxygen of 0.4 - 0.6, by means of a  
33 computer-driven small-animal ventilator (flexiVent, Scireq, Montreal, Canada), as previously  
34 reported. The tracheal cannula was properly secured with surgical thread (Ethicon 3-0, Ethicon,  
35 Auneau, France) before connection to mechanical ventilator in order to avoid leaks. The cervicotomy  
36 was closed with surgical thread (Ethicon 6.0, Ethicon, Auneau, France). Mechanical ventilation lasted  
37 two hours with continuous anesthesia maintained by 1.5% inhaled isoflurane and muscle paralysis  
38 using intraperitoneal pancuronium at the onset of the experiment (0.8  $\mu\text{g/g}$  of body weight; Organon,  
39 Puteaux, France) to ensure passive mechanical conditions. The body temperature was monitored using  
40 a rectal probe and was maintained at 36.5°C with a blanket connected to a homeothermic regulator  
41 (Homeo-blanket system 50-7221F, Harvard Apparatus, Les Ulis, France). An intraperitoneal warm  
42 fluid bolus of 20  $\mu\text{L/g}$  of saline was performed immediately after the induction of anesthesia. A  
43 control group (SV) consisted of anesthetized, intubated mice, maintained on spontaneous ventilation  
44 for two hours, under conditions identical to MV mice, except for muscle paralysis. At the end of the  
45 timed ventilator protocol, mice were exsanguinated via sectioning the left carotid artery. Arterial  
46 blood was obtained, using a heparinized needle and syringe, then transported in ice rapidly after  
47 collection, for determination of blood gases, using a GEM Premier 3000 analyser (Instrumentation  
48 Laboratory, Lexington, MA, USA) in D21 mice. Blood gases data were similar between the 4 groups  
49 at D21 (n=10-13/group), allowing us to validate fluid replacement strategy, and both ventilator

50 settings in MV mice, and anesthesia depth in SV mice (table S1). To note, blood gases analysis were  
 51 not performed in D14 mice, and the validity of the experimental protocol has been extrapolated to this  
 52 group.

**TABLE S1. Arterial blood gases** in SV and MV mice, 21 days after saline or elastase tracheal instillation.

|                                            | Saline SV   | Elastase SV | Saline MV   | Elastase MV |
|--------------------------------------------|-------------|-------------|-------------|-------------|
| <b>PaO<sub>2</sub>/FiO<sub>2</sub></b>     | 450 ± 100   | 371 ± 124   | 417 ± 99    | 460 ± 84    |
| <b>PaCO<sub>2</sub>, mmHg</b>              | 27 ± 7      | 34 ± 21     | 34 ± 10     | 30 ± 6      |
| <b>pH</b>                                  | 7.31 ± 0.08 | 7.30 ± 0.16 | 7.23 ± 0.09 | 7.28 ± 0.12 |
| <b>HCO<sub>3</sub><sup>-</sup>, mmol/L</b> | 14.6 ± 3.7  | 15.1 ± 5.1  | 16.4 ± 3.9  | 15.3 ± 7.0  |
| <b>Lactates, mmol/L</b>                    | 3.2 ± 2.4   | 3.2 ± 3.0   | 2.8 ± 0.7   | 2.5 ± 1.0   |

*Definition of abbreviations:* PaO<sub>2</sub>, partial pressure of oxygen in arterial blood; PaCO<sub>2</sub>, partial pressure of carbone dioxide in arterial blood; SV, spontaneous ventilation; MV, mechanical ventilation.

Values are expressed as median ± interquartile range; n = 10-13 animals /group.

No significant difference was found between groups. Ventilator settings (MV mice) and anesthesia depth (SV mice) allowed suitable minute ventilation.

53

## 54 **Respiratory mechanics**

55 Special features of the *flexiVent* ventilator include a continuous monitoring of airway pressures and a  
 56 precision computer-controlled piston that is capable of accurately measuring the delivered volume  
 57 (with appropriate corrections for gas compression) and to produce any desired waveform, allowing  
 58 respiratory mechanics assessment with the forced oscillation technique and pressure-volume curves.  
 59 Before each mouse was connected to the ventilator, pressure and piston displacement calibration data  
 60 were collected to correct the respiratory mechanics data. Mice were allowed to stabilize on the  
 61 ventilator for 5 minutes and were then inflated three times to a transrespiratory pressure of 30 cmH<sub>2</sub>O  
 62 to establish a standard volume history. Forced oscillation technique were assessed at initiation of  
 63 mechanical ventilation, before (H0) and after (H0') volume history standardization (recruitment  
 64 maneuver), and then repeated hourly (H1 and H2), to capture the time course and the detailed  
 65 response to mechanical ventilation. Respiratory system dynamic resistance, elastance, and compliance  
 66 were calculated in the *flexiVent* software by fitting the single frequency forced oscillation technique  
 67 data (a 1.2 second, 2.5 Hz single-frequency signal called SnapShot-150 perturbation) to the single  
 68 compartment model. In addition, a continuous pressure-volume curve (pressure-driven from 3 to 30

69 cmH<sub>2</sub>O) was performed at start and end of mechanical ventilation. The loops were processed by the  
70 *flexiVent* software to fit the Salazar-Knowles equation and to calculate parametric results, such as the  
71 quasi-static compliance of the respiratory system.

72

### 73 **Specimen collection**

74 After sacrifice by exsanguination via sectioning the left carotid artery, two sets of samples collection  
75 were performed. In a first set of experiments, a thoracotomy was immediately performed, exposing  
76 heart and lungs. Pulmonary circulation was flushed with 2 mL of saline directly injected into the right  
77 ventricle after ablation of the left atrium. Lungs were then harvested, fixed in 4% paraformaldehyde by  
78 tracheal injection at a constant transpleural pressure of 20cmH<sub>2</sub>O, held in 4% paraformaldehyde and  
79 finally embedded in paraffin. In a second set of experiments, bronchoalveolar lavage (BAL) was first  
80 performed with two separate 1 mL aliquots of saline at 20°C injected through tracheal tube. Then  
81 immediately following thoracotomy, pulmonary circulation was identically flushed (to remove  
82 residual blood within pulmonary vasculature and reduce nonadherent leukocytes from subsequent  
83 flow cytometric analysis), and both lungs were collected for flow cytometry analysis.

84

### 85 **Morphometric analysis**

86 Great-axis sagittal sections of 5 µm thickness of the left lung were cut in a systematic fashion and  
87 were stained with hematoxylin and eosin. Five digital photomicrographs were acquired from the  
88 cranial, medial, and caudal regions of each slide at x200 magnification, excluding areas where large  
89 bronchi or vessels predominated, resulting in a total of 15 images per lung (Axioplan 2 microscope  
90 *equipped with an MRc digital color camera (Zeiss, Oberkochen, Germany)*). Emphysema was  
91 quantified by measurement of alveolar diameters with an image analysis software (ImageJ, NIH,  
92 Bethesda, USA). This automated analysis was made vertically and horizontally on each  
93 photomicrograph. The mean chord length of alveoli was obtained by averaging those measurements.

94

95 **Bronchoalveolar lavage**

96 The total cell count of BAL was determined for a fresh fluid specimen using a Malassez  
97 hemocytometer (Hycor biomedical, Indianapolis, IN, USA). BAL fluid was centrifuged (1500 rpm, 15  
98 min at 4°C). The cell pellet was diluted in saline, and differential cell counts were done on  
99 cytocentrifuge preparations (Cytospin3; Shandon Scientific, Cheshire, UK) stained with Diff-Quick  
100 stain (Baxter Diagnostics, McGaw Park, IL, USA).

101

102 **Flow cytometric analysis**

103 *Preparation of lung cell suspensions*

104 Freshly collected lungs were immediately placed in a storage medium consisting of RPMI 16/40  
105 supplemented with 0.1% L-glutamine and 0.1% nonessential amino acids and kept on ice. Mechanical  
106 disruption followed by enzymatic digestion of murine lungs were then performed, as previously  
107 described. Lung tissue, placed in previously described medium, supplemented with 5% fetal bovine  
108 serum (FBS), 0.35 mg/mL collagenase XI (Sigma-Aldrich, Saint Louis, MO, USA) and 0.1 mg/mL  
109 type IV bovine pancreatic DNase (Sigma-Aldrich), was cut into small pieces by rapid chopping using  
110 a scalpel. The dissected tissue was then incubated at 37°C with 5% CO<sub>2</sub> during 35 minutes.  
111 Enzymatic action was stopped by adding 9 mL of previous medium storage containing 10% FBS, and  
112 digested lungs were further disrupted by gently pushing the tissue through a 70 µm nylon cell strainer.  
113 Cell suspensions were then centrifuged at 900 rpm. To lyse contaminating red blood cells, the cell  
114 pellet was incubated during 5 minutes at room temperature with 5 ml of ACK Lysing Buffer (NH<sub>4</sub>Cl  
115 and KHCO<sub>3</sub>, ThermoFisher Scientific Waltham, MA, USA). Cells were then washed with saline,  
116 recentrifuged, and the pellet resuspended in 4 ml of saline. Cell counts were performed using a  
117 Malassez hemocytometer after Trypan blue staining. Cell suspensions were lastly centrifuged and  
118 resuspended in saline in order to obtain approximately 10 millions cells per mL. In cytometry

dedicated tubes, 500,000 cells (50  $\mu$ L) were incubated with 50  $\mu$ L of anti-mouse CD16/CD32 (Fc Block, 10 $\mu$ g/mL, clone 2.4G2, BD Biosciences, San Jose, CA, USA) at 4°C during 15 minutes, to prevent nonspecific binding of antibodies to the Fc receptors, and then stained with fluorochrome-conjugated anti-mouse antibodies for CD11b, CD11c, Gr1 (Ly6C/G), F4/80 and CD62L (L-selectin) or appropriate isotype-matched controls. All antibodies used are listed in table S2. Finally, cytometry tubes were centrifuged, cell pellets resuspended in 500  $\mu$ L saline with 1% formaldehyde, and tubes were stored away from light at 4°C.

**TABLE S2. Fluorochrome conjugated anti-mouse antibodies.**

| Surface molecule | Fluorochrome | Clone   | Isotype control           | Manufacturer   |
|------------------|--------------|---------|---------------------------|----------------|
| Ly6G/Ly6C (Gr1)  | FITC         | RB6-8C5 | Rat IgG2a, $\kappa$       | BD Biosciences |
| Ly6G/Ly6C (Gr1)  | PE/Cy7       | RB6-8C5 | Rat IgG2b, $\kappa$       | Biolegend      |
| CD11c            | PE           | HL3     | Hamster IgG1, $\lambda$ 2 | BD Biosciences |
| F4/80            | PE/Cy7       | BM8     | Rat IgG2a, $\kappa$       | Biolegend      |
| CD62L            | APC          | MEL-14  | Rat IgG2a, $\kappa$       | Biolegend      |
| CD11b            | APC/Cy7      | M1/70   | Rat IgG2b, $\kappa$       | BD Biosciences |

BD Biosciences, San Jose, CA, USA; Biolegend, San Diego, CA, USA

126

#### 127 *Identification of inflammatory cell populations*

Cells were analysed the following day by a 7channel cytometer (CyAn ADP Analyser, Beckman Coulter, Brea, USA). One channel was dedicated to measurement of cell autofluorescence. Complete data analysis was performed with Summit software (Summit v4.3, Dako, Cambridge, UK). Three inflammatory cell populations in murine lung were identified (figure S1). CD11b<sup>-</sup>, CD11c<sup>+</sup> phenotype, with high autofluorescence defined alveolar macrophages (figure S1c). Monocytes and neutrophils were identified as CD11b<sup>+</sup>, CD11c<sup>-</sup> cells but differ in their granularity (side-scatter, SS), and F4/80 and Gr1 expression. High SS and F4/80<sup>-</sup>, Gr1<sup>+</sup> phenotype defined neutrophils, whereas low SS, and F4/80<sup>+</sup>, Gr1<sup>mid</sup> phenotype characterized monocytes (figures S1d, S1e, S1f). Cells activation state were assessed using expression of CD62L and CD11b adhesion molecule, as well as Gr1. All flow cytometric results were presented as relative values, called percentage of gated cells. Indeed, our cytometer did not allow automated simultaneous counting of collected lung cells, resulting in inaccurate absolute values.

140

141 **Figure S1.** Flow cytometric analysis of different inflammatory cell populations in mouse lungs. **a.**  
142 Dot-plot showing side-scatter (SS) versus forward-scatter (FS) within total cell population. Cellular  
143 debris and lymphocyte were excluded from the analysis. Myeloid cells were gated (G1) on compatible  
144 size (FS) and granularity (SS). **b.** Dot-plot showing FS versus pulse width within G1 gated events.  
145 Doublets and triplets were subtracted from cell analysis through a second gate (G2) defined on pulse  
146 width, which distinguished cell aggregates from unique events (called singlets). From there, only  
147 combined G1 and G2 gated events were analysed. **c.** Dot-plot showing CD11c versus CD11b  
148 expression within combined G1 and G2 gated events. Alveolar macrophages were identified by  
149 CD11c+ CD11b- phenotype. Autofluorescence level was high in this cell population. **d.** Dot-plot SS  
150 versus CD11b expression within combined G1 and G2 gated events. G3 gated CD11b+ cells with  
151 neutrophils compatible granularity, G4 gated CD11b+ cells with monocytes compatible granularity. **e.**  
152 Dot plot CD11c versus Gr1 expression within combined G1, G2 and G3 gated events. Neutrophils  
153 were defined as CD11c- Gr1+ cells. **f.** Dot plot CD11c versus Gr1 expression within combined G1,  
154 G2 and G4 gated events. Monocytes were defined as CD11c- Gr1mid cells.

155

**a.**

**b.**

**c.**

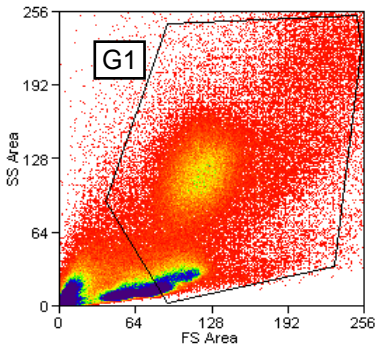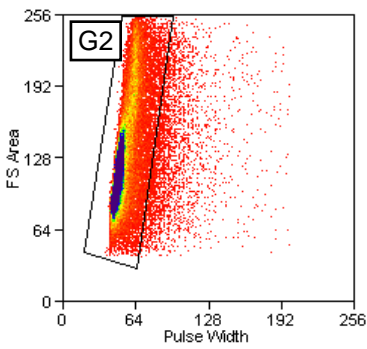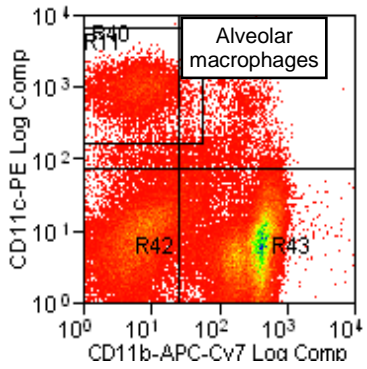

**d.**

**e.**

**f.**

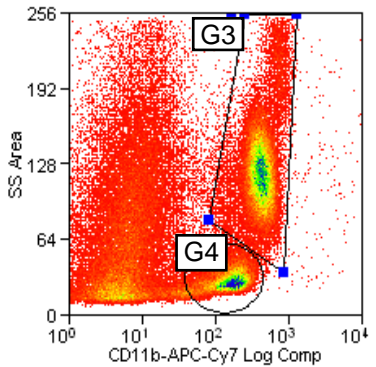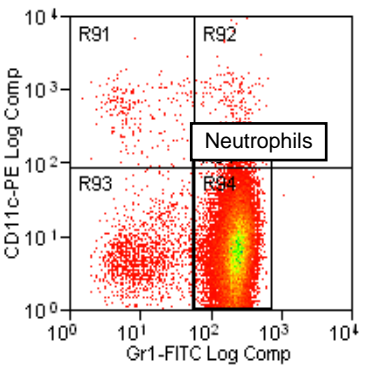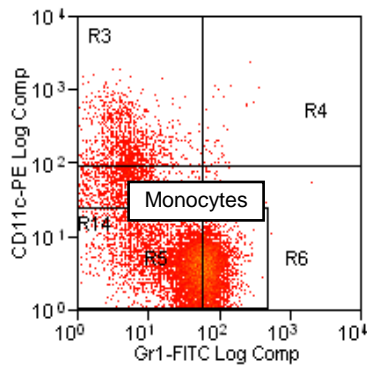

159  
160
